# Supplementary material
Source: Research Square preprint supplement (doi:10.21203/rs.3.rs-9663367/v1)
Supplement: Supplementary file 1 [file 54138c09ac7114fc52cb1bdd.docx]

**Additional file 1: Full search strategy for PubMed**

**Article title**: Experiences and Coping Strategies of Patients with Face-down Positioning after Vitrectomy: A Meta-synthesis of Qualitative Studies

**Database searched**: PubMed

**Search execution date**: 1 April 2026

**Filters applied**: None (no language or date filter applied at the database level; language restrictions and date cut-off were applied during screening).

| **Search #** | **Query** | **Results** |
| --- | --- | --- |
| #1 | "Vitrectomy"[Mesh] OR "Retinal Detachment/surgery"[Mesh] OR "Retinal Perforations/surgery"[Mesh] OR vitrectomy[tiab] OR "pars plana vitrectomy"[tiab] OR PPV[tiab] OR "vitreoretinal surgery"[tiab] OR "vitreoretinal surgeries"[tiab] OR "intraocular tamponade"[tiab] OR "silicone oil"[tiab] OR "gas tamponade"[tiab] OR "macular hole surgery"[tiab] OR "retinal detachment surgery"[tiab] | 65,155 |
| #2 | "Prone Position"[Mesh] OR "Patient Positioning"[Mesh] OR "Posture"[Mesh] OR "Treatment Adherence and Compliance"[Mesh] OR "prone position*"[tiab] OR "face-down"[tiab] OR "face down"[tiab] OR facedown[tiab] OR "head-down"[tiab] OR "head down"[tiab] OR "forced position*"[tiab] OR "positioning compliance"[tiab] OR "postural requirement*"[tiab] OR (postur*[tiab] AND (complian*[tiab] OR adheren*[tiab])) | 398,096 |
| #3 | "Qualitative Research"[Mesh] OR "Interviews as Topic"[Mesh] OR "Focus Groups"[Mesh] OR "Adaptation, Psychological"[Mesh] OR qualitative[tiab] OR phenomenolog*[tiab] OR "grounded theory"[tiab] OR ethnograph*[tiab] OR "content analysis"[tiab] OR "thematic analysis"[tiab] OR interview*[tiab] OR "focus group*"[tiab] OR "lived experience*"[tiab] OR experience*[tiab] OR perception*[tiab] OR perspective*[tiab] OR feeling*[tiab] OR coping[tiab] OR narrative*[tiab] | 3,306,183 |
| #4 | #1 AND #2 AND #3 | **111** |
