# Supplementary material
Source: Research Square preprint supplement (doi:10.21203/rs.3.rs-9663367/v1)
Supplement: Supplementary file 2 [file ac090f33264edfd4424865dc.xlsx]

## Sheet: README
Additional file 2: Mapping of findings to descriptive sub-themes and analytical themes
Article title:	Experiences and Coping Strategies of Patients with Face-down Positioning after Vitrectomy: A Meta-synthesis of Qualitative Studies
Description:	This Additional file documents the analytical pathway of the qualitative meta-synthesis, from individual study findings through 12 descriptive sub-themes to 4 overarching analytical themes. It supports the methodological transparency of the thematic synthesis approach (Thomas & Harden 2008) and underpins the GRADE-CERQual confidence assessment reported in Table 5 of the main manuscript.
Contents:
Sheet 1	README — This page.
Sheet 2	Findings overview by study — Number of findings retained from each included study after the exclusion of out-of-scope findings, with a breakdown of unequivocal (U) and credible (C) findings.
Sheet 3	Sub-themes to themes mapping — The 12 descriptive sub-themes identified through inductive coding, the studies contributing to each sub-theme, and their grouping under the four analytical themes.
Sheet 4	Saturation assessment — Evaluation of the data saturation for each descriptive sub-theme, informing the GRADE-CERQual adequacy of data assessment.
Note on the coding process:	Inductive line-by-line coding of the six included studies initially yielded 103 candidate findings. During first-stage coding, six findings describing matters outside the face-down positioning experience itself were excluded by independent judgement of two researchers (see Methods section of the main manuscript). The remaining 97 findings were retained for synthesis and are summarised in this Add…
Note on findings labelling:	Each retained finding was labelled as 'unequivocal' (U) when supported by a direct participant quotation, or 'credible' (C) when derived from the authors' interpretive summary, following Munn et al. (2014).
Note on quotations:	Representative participant quotations supporting each sub-theme are provided in the Results section of the main manuscript. To respect copyright of the included studies, this file presents the analytical structure rather than the full set of extracted quotations. The complete extraction tables (in the original languages of the included studies) are available from the corresponding author upon rea…

## Sheet: Findings by study
Sheet 2: Findings overview by included study
After excluding 6 out-of-scope findings from the initial 103 candidate findings, a total of 97 findings were retained for synthesis from the six included studies.
Study (first author, year)	Findings retained for synthesis (n)	Unequivocal (U)	Credible (C)	U proportion
Wittich & Southall, 2008	36	22	14	61.1%
Hou et al., 2009 [in Chinese]	13	3	10	23.1%
Tan et al., 2021 [in Chinese]	8	6	2	75.0%
Li et al., 2022	30	19	11	63.3%
Zhang et al., 2023	5	3	2	60.0%
Wang et al., 2025 [in Chinese]	5	4	1	80.0%
Total	97	57	40	58.8%
Note: U = unequivocal (directly supported by participant quotations); C = credible (derived from the authors' interpretive summaries) . Six findings were excluded during first-stage coding as they described matters outside the face-down positioning experience itself.

## Sheet: Sub-themes to themes
Sheet 3: Mapping of descriptive sub-themes to analytical themes
The 12 descriptive sub-themes generated through inductive coding were organised into four overarching analytical themes through ongoing comparison and team discussion. The columns below show the contributing studies and number of supporting findings for each sub-theme.
Analytical theme	Descriptive sub-theme	Findings (n)	Studies (n)	Contributing studies
Theme 1: The Body Under Siege	Multi-site persistent bodily pain	23	6	Hou 2009; Tan 2021; Li 2022; Zhang 2023; Wang 2025; Wittich 2008
	Posture-induced head-and-face pressure symptoms	6	3	Hou 2009; Li 2022; Zhang 2023
	Severe sleep deprivation and nocturnal torment	10	4	Hou 2009; Tan 2021; Wang 2025; Wittich 2008
	Posture-related gastrointestinal and elimination disturbances	6	4	Hou 2009; Tan 2021; Li 2022; Wittich 2008
Theme 2: Suspended Time	Deprivation of recreation and the burden of boredom	4	2	Wang 2025; Wittich 2008
	Depressive mood, loneliness, and loss of meaning	5	4	Hou 2009; Li 2022; Zhang 2023; Wittich 2008
	Counting the days: waiting and temporal endurance	5	2	Hou 2009; Wittich 2008
Theme 3: Dual Pathways of Coping	Active strategies for enduring postural adversity	8	2	Li 2022; Wittich 2008
	Passive accommodation and withdrawal from adherence	8	1	Li 2022
Theme 4: Invisible Walls	Dependence on family care: gratitude and guilt	8	2	Tan 2021; Wittich 2008
	Gaps in professional guidance and continuity of follow-up	6	3	Hou 2009; Tan 2021; Li 2022
	Structural pressures: economic, occupational, and familial constraints	8	1	Li 2022
Total	(across 12 sub-themes)	97	6	6 included studies
Note: 'Findings (n)' refers to the number of individual findings extracted across the included studies that contribute to each sub-theme. 'Studies (n)' refers to the number of distinct studies (out of six) providing at least one finding to that sub-theme.

## Sheet: Saturation assessment
Sheet 4: Saturation assessment of descriptive sub-themes
Each descriptive sub-theme was evaluated for data saturation based on the number of contributing studies, the breadth of findings, and the depth of supporting accounts. This assessment informed the 'adequacy of data' component of the GRADE-CERQual appraisal (see Table 5 in the main manuscript).
Descriptive sub-theme	Findings (n)	Studies (n)	Saturation rating	Comments
Multi-site persistent bodily pain	23	6	High	Strongest evidence base in this synthesis; spans all six included studies and Western/Chinese populations, with consistent findings across diverse disease courses.
Posture-induced head-and-face pressure symptoms	6	3	Adequate	Supported by three Chinese studies focused on periorbital, intraocular, and forehead pressure symptoms. Future research should include more English-language studies of pars plana vitrectomy positioning to verify cross-cultural consistency.
Severe sleep deprivation and nocturnal torment	10	4	High	Spans four studies including Wittich 2008's longitudinal sleep-focused diary; the evidence chain is complete (postural difficulty, pressure-induced waking, reflux, and emotional disturbance).
Posture-related gastrointestinal and elimination disturbances	6	4	Adequate	Identified for the first time as an integrated theme across four studies, presenting a symptom chain (nausea, reflux, appetite loss, fluid restriction-induced constipation). Future research could integrate dietary and elimination management with nursing interventions during the positioning period.
Deprivation of recreation and the burden of boredom	4	2	Adequate	Supported by Wittich 2008 and Wang 2025 across Western and Chinese contexts. Future research could expand to digital entertainment and audio media as compensatory strategies during the postural period.
Depressive mood, loneliness, and loss of meaning	5	4	Adequate	Covered by four studies, presenting cross-cultural consistency in postural depressive experience. Future work could distinguish acute-phase versus prolonged-phase depressive trajectories.
Counting the days: waiting and temporal endurance	5	2	Adequate	Wittich 2008 contributes the richest verbatim chain (psychological deadlines and bubble milestones), with Hou 2009 providing convergent evidence. Future longitudinal diary studies could capture the dynamic temporal experience throughout the positioning period.
Active strategies for enduring postural adversity	8	2	Adequate	Active strategies are concentrated in Wittich 2008 (Western individualised coping) and Li 2022 (temporal scheduling). Future research could systematically evaluate the efficacy of optical aids, mindfulness, and audio-based interventions.
Passive accommodation and withdrawal from adherence	8	1	Limited (single-study support)	Only Li 2022 deeply portrays the motivational chain of passive coping (fatigue, forgetting, symptom relief, questioning, and withdrawal). Other included studies contain scattered traces of withdrawal but did not extract them as independent findings. Future research should specifically investigate the cognitive-behavioural mechanisms of postural non-adherence, particularly in rural, low-income, or…
Dependence on family care: gratitude and guilt	8	2	Adequate	Supported by Wittich 2008 and Tan 2021, with evidence concentrated on spouses and immediate family. Future research could include the postural experience of single, lone-living, or under-supported populations.
Gaps in professional guidance and continuity of follow-up	6	3	Adequate	Spans three studies across different time periods (2009, 2021, 2022), suggesting that this gap is persistent and cross-institutional. This is one of the most intervention-relevant themes in the synthesis.
Structural pressures: economic, occupational, and familial constraints	8	1	Limited (single-study support)	Only Li 2022, through 34 in-depth interviews, reveals systemic pressures including economic burden, occupational time conflicts, gendered caregiving roles, family member counter-pressure, and geographic distance. This represents a unique theoretical contribution of the present synthesis. Future cross-national, cross-class, and cross-gender qualitative research is urgently needed to validate the i…
Saturation rating definitions:
• High — supported by ≥4 studies and ≥10 findings, with rich and convergent data.
• Adequate — supported by 2–4 studies, with consistent findings and reasonable depth.
• Limited — supported by only 1 study; included in the synthesis as a conceptual contribution but flagged as a research gap.
